# Supplementary material for: High Diversity in Iron Cycling Microbial Communities in Acidic, Iron-Rich Water of the Pyhäsalmi Mine, Finland
Source: Hindawi journal article supplement (doi:10.1155/2019/7401304), 2019-03-10
Supplement: f1 [file 7401304.f1.xlsx]

## Sheet: Table S1
Table S1. The composition of elements in the original mine water. The most important compounds are shown in Table 2.
Measurement	Method	unit	P240m	P500m	P600m
Ag	ICP-MS	mg/L	<0.00001	<0.00001	<0.00001
As	ICP-MS	mg/L	0.052	0.0735	0.02
B	ICP-MS	mg/L	0.2415	0.2705	0.068
Ba	ICP-MS	mg/L	0.002	<0.0001	0.003
Be	ICP-MS	mg/L	0.1365	0.05	0.0085
Bi	ICP-MS	mg/L	<0.001	<0.001	<0.001
Cd	ICP-MS	mg/L	5.055	3.295	0.195
Co	ICP-MS	mg/L	5.78	2.02	0.295
Cr	ICP-MS	mg/L	0.446	0.2665	0.059
Li	ICP-MS	mg/L	3.545	1.285	0.24
Mo	ICP-MS	mg/L	<0.00002	<0.00002	<0.00002
Ni	ICP-MS	mg/L	19.8	3.69	0.195
P	ICP-MS	mg/L	0.247	0.426	0.086
Pb	ICP-MS	mg/L	0.0445	0.001	0.0345
Rb	ICP-MS	mg/L	0.0215	0.005	0.0205
Sb	ICP-MS	mg/L	<0.002	<0.002	<0.002
Se	ICP-MS	mg/L	0.071	0.016	0.0065
Sr	ICP-MS	mg/L	0.9385	0.573	0.64
Th	ICP-MS	mg/L	0.056	0.027	0.003
Ti	ICP-MS	mg/L	0.001	<0.00002	0.003
U	ICP-MS	mg/L	1.431	0.6675	0.123
V	ICP-MS	mg/L	0.004	0.024	0.007
Zn	ICP-MS	mg/L	1992.5	1550.5	91.4
Ca	ICP-OES	mg/L	376	345	345
K	ICP-OES	mg/L	3.06	<0.5	3.36
Na	ICP-OES	mg/L	45	37.5	27.9
Si	ICP-OES	mg/L	48	39.9	49.4
Cl	IC	mg/L	24	24	6.6
F	IC	mg/L	79	39	5.2

## Sheet: Table S2
Table S2. Relative abundance of bacterial genera present in the different samples and enrichment cultures. All genera present at higher than 0.1% relative abundance in at least one sample or enrichment are shown. The genera present at less than 0.1% relative abundance in all samples or enrichments are included in the ‘Other bacteria’ group at the end of the table.
Phylum	Class	Order	Family	Genus	P240m_A	P240m_B	P240m_180	P240m_176	P240m_Fe(III)	P240m_Fe(III)Ye		P500m_A	P500m_B	P500m_180	P500m_176	P500m_(FeIII)	P500m_(FeIII)Ye		P600m_A	P600m_B	P600m_180	P600m_176	P600m_Fe(III)	P600m_Fe(III)Ye
Acidobacteria	Acidobacteria	Acidobacteriales	Acidobacteriaceae_(Subgroup_1)	Acidobacteriaceae_(Subgroup_1)_unclassified	0.00423472		0.000669792		0.00127065	0.000888889		0.0111074	0.00980777		0.000464972				0.000542888	0.00383206		0.000635189	0.00107335	0.000503271
	Solibacteres	Solibacterales	Solibacteraceae_(Subgroup_3)	Bryobacter					0.00127065	0.012				0.000436491			0.000727273		0.000542888	0.000166611
Actinobacteria	Acidimicrobiia	Acidimicrobiales	Acidimicrobiaceae	Acidithrix	0.00665457	0.000877578	0.000334896		0.00381194	0.000888889		0.000777519	0.000980777	0.00218245	0.000619963	0.00181159	0.00290909		0.135722	0.0196601	0.000442674	0.000846919	0.00178891	0.000503271
				Ferrimicrobium	0.0193587	0.0118473	0.00502344		0.00762389	0.00577778		0.034433	0.0351118	0.0257529	0.0446373	0.0271739	0.0101818		0.0103149	0.0186604	0.00752545	0.0277366	0.00751342	0.00905888
			Acidimicrobiales_unclassified	Acidimicrobiales_unclassified		0.000438789	0.000669792		0.00127065			0.00244363	0.00235386						0.0108578	0.008997				0.000503271
			uncultured	uncultured_ge	0.00362976	0.00131637	0.00234427		0.00635324			0.00699767	0.0109847	0.0113488	0.0034098	0.00724638	0.00218182		0.019544	0.0644785	0.00486941	0.000846919	0.00715564	0.00201309
	Actinobacteria	Corynebacteriales	Corynebacteriales_unclassified	Corynebacteriales_unclassified								0.000111074				0.0235507				0.000166611
			Mycobacteriaceae	Mycobacterium	0.00544465	0.00219394	0.00267917			0.00355556		0.00222148	0.00137309	0.00130947	0.00247985	0.568841	0.00290909		0.00434311	0.00183272	0.00442674	0.00190557	0.00357782	0.00402617
		Frankiales	Acidothermaceae	Acidothermus	0.00120992					0.000444444		0.00166611	0.00156924	0.000436491	0.000154991				0.02443	0.00799733	0.000442674		0.00107335
			Sporichthyaceae	Candidatus_Planktophila		0.000438789						0.000222148			0.000154991		0.000727273		0.000542888	0.000166611	0.000442674			0.0619024
		Micrococcales	Dermacoccaceae	Dermacoccaceae_unclassified		0.000438789	0.0127261					0.000111074							0.00108578		0.000885347	0.000635189	0.00107335	0.000503271
			Intrasporangiaceae	Intrasporangiaceae_unclassified						0.000888889							0.016		0.000542888		0.000442674	0.00021173	0.000357782	0.00100654
			Microbacteriaceae	Microbacteriaceae_unclassified	0.000604961	0.000438789				0.000888889		0.000333222	0.000196155	0.00130947	0.000154991					0.000333222	0.0243471	0.00042346		0.0498239
			Micrococcaceae	Arthrobacter	0.000604961					0.0186667		0.000222148					0.000727273					0.00021173
				Micrococcus	0.00181488	0.000877578			0.00381194	0.00133333		0.00133289	0.000588466	0.00218245	0.000619963	0.00181159	0.00290909		0.00162866	0.0014995	0.0801239	0.00042346	0.00178891	0.0070458
		Propionibacteriales	Propionibacteriaceae	Propionibacterium	0.000604961	0.000877578	0.0083724		0.0139771	0.004		0.00222148	0.000784621	0.0384112	0.000929944	0.00724638	0.0174545		0.00380022	0.00183272	0.00132802	0.00105865	0.00178891	0.00805234
Armatimonadetes	Fimbriimonadia	Fimbriimonadales	Fimbriimonadaceae	Fimbriimonadaceae_ge	0.000604961		0.00100469		0.0025413	0.000888889		0.000222148	0.000588466	0.0261894						0.000333222	0.000442674	0.00021173	0.000715564
Bacteria_unclassified	Bacteria_unclassified	Bacteria_unclassified	Bacteria_unclassified	Bacteria_unclassified	0.000604961	0.000877578	0.000334896			0.000888889		0.00755304	0.00313849	0.00218245	0.000619963		0.00218182		0.000542888	0.0159947	0.000442674	0.00127038	0.00214669
Bacteroidetes	Bacteroidia	Bacteroidales	Bacteroidaceae	Bacteroides					0.0101652					0.000436491	0.000154991
	Sphingobacteriia	Sphingobacteriales	Sphingobacteriaceae	Pedobacter		0.000438789	0.000334896			0.000444444													0.000357782	0.0145949
Cyanobacteria	Chloroplast	Chloroplast_or	Chloroplast_fa	Chloroplast_ge	0.00241984	0.00263273	0.00200938		0.00381194	0.00755556		0.00311007	0.00235386	0.0144042	0.00232486	0.00362319	0.197091		0.00325733	0.00633122	0.0362992	0.0021173	0.00536673	0.00654253
	Cyanobacteria	SubsectionIII	FamilyI	Leptolyngbya										0.0165866						0.000166611
Firmicutes	Bacilli	Bacillales	Staphylococcaceae	Staphylococcus			0.00167448		0.00127065	0.0333333		0.000111074	0.000196155	0.00305543	0.000154991	0.00181159	0.00509091		0.0108578		0.00132802
		Lactobacillales	Carnobacteriaceae	Carnobacterium					0.00127065	0.000444444														0.0216407
			Streptococcaceae	Streptococcus	0.000604961	0.000438789	0.00200938		0.00127065	0.068		0.000333222	0.000980777	0.0218245	0.000619963				0.00162866	0.000333222	0.0345286	0.00021173	0.000357782	0.00251636
	Clostridia	Clostridiales	Clostridiaceae_1	Clostridium_sensu_stricto_1	0.0030248	0.00482668	0.00200938		0.0025413	0.00488889		0.00222148	0.00196155	0.00218245	0.00108493	0.00724638	0.00363636		0.00108578	0.00166611	0.115981	0.00190557	0.00143113	0.0729743
			Family_XI	Peptoniphilus						0.0488889		0.00055537	0.000196155				0.000727273				0.000442674	0.00021173
			Lachnospiraceae	Blautia					0.0177891
				Coprococcus_2					0.0317662
				Lachnospiraceae_ND3007_group					0.0355781													0.00042346
				Roseburia					0.025413			0.000222148							0.00488599
			Peptostreptococcaceae	Peptostreptococcaceae_unclassified	0.000604961		0.000669792		0.0114358	0.0106667		0.000111074		0.000436491			0.0152727			0.000333222				0.00805234
				Romboutsia			0.00200938		0.109276	0.166222		0.00188826		0.0144042	0.00123993	0.00362319	0.250182		0.00271444	0.000499833	0.00664011	0.0021173	0.00214669	0.101158
			Ruminococcaceae	Faecalibacterium			0.000334896		0.0304956			0.000111074								0.000333222
				Ruminococcaceae_NK4A214_group					0.0203304											0.000166611
				Ruminococcaceae_ge					0.0584498								0.00218182			0.000166611
				Ruminococcus_2					0.0101652	0.000444444			0.000392311		0.000154991						0.0261178
				Subdoligranulum					0.0330368			0.000111074	0.000392311									0.00042346
			Syntrophomonadaceae	Syntrophomonas		0.000438789			0.00127065					0.000436491										0.0140916
Nitrospirae	Nitrospira	Nitrospirales	Nitrospiraceae	Leptospirillum	0.182698	0.306713	0.449431		0.0800508	0.0404444		0.809619	0.775206	0.479267	0.83757	0.0507246	0.0567273		0.107492	0.245585	0.0863214	0.845437	0.0261181	0.048314
Parcubacteria	Parcubacteria_unclassified	Parcubacteria_unclassified	Parcubacteria_unclassified	Parcubacteria_unclassified	0.000604961					0.0475556						0.00181159			0.00162866			0.00021173	0.00143113
Proteobacteria	Alphaproteobacteria	Caulobacterales	Caulobacteraceae	Brevundimonas	0.00120992							0.000111074	0.000196155	0.000872981	0.000154991					0.000333222	0.000442674	0.00021173	0.000715564	0.0392552
		Rhizobiales	Bradyrhizobiaceae	Bradyrhizobiaceae_unclassified		0.00131637	0.000669792			0.0737778		0.000222148	0.000196155	0.000436491		0.00181159	0.000727273		0.00108578	0.000499833	0.00177069	0.00021173	0.00178891	0.000503271
				Bradyrhizobium		0.000438789	0.000334896		0.0177891			0.000222148	0.000196155		0.000464972		0.0261818			0.000166611			0.000357782
			Methylobacteriaceae	Methylobacterium	0.00120992	0.00263273	0.000669792		0.00127065	0.000444444		0.000999667		0.00174596	0.000464972		0.016				0.000442674	0.00105865	0.00143113	0.0473075
		Rhodobacterales	Rhodobacteraceae	Cereibacter												0.00181159				0.000166611				0.011072
		Rhodospirillales	Acetobacteraceae	Acetobacteraceae_unclassified		0.000877578	0.00368386		0.0660737	0.000444444		0.000111074	0.000588466		0.000619963		0.000727273		0.00162866	0.00533156	0.000442674	0.000846919	0.0107335
				Acidiphilium	0.0840895	0.0522159	0.235767		0.0381194	0.02		0.00755304	0.00843468	0.0890441	0.0210787	0.0108696	0.0181818		0.0304017	0.0396534	0.0548915	0.00635189	0.773882	0.0206341
		Sphingomonadales	Sphingomonadales_unclassified	Sphingomonadales_unclassified		0.000877578	0.0190891			0.00177778		0.000111074	0.000196155	0.00130947		0.00362319	0.000727273			0.000333222	0.000442674	0.00021173		0.000503271
	Betaproteobacteria	Burkholderiales	Burkholderiaceae	Ralstonia	0.0030248	0.00438789	0.00100469		0.0317662	0.0151111		0.000999667	0.000196155	0.00698385	0.000309981		0.0167273		0.00434311	0.000166611	0.0110668	0.00127038	0.00178891	0.0115752
			Oxalobacteraceae	Massilia		0.000438789			0.00381194	0.000444444					0.000154991					0.000166611		0.00042346	0.000357782	0.0156014
				Oxalobacteraceae_unclassified	0.000604961	0.000438789	0.000334896			0.000444444		0.000222148							0.000542888	0.000333222	0.000442674			0.0231505
		Ferrovales	Ferrovaceae	Ferrovum	0.00362976	0.00307152	0.000669792		0.0025413	0.00222222		0.00155504		0.00174596	0.000774954		0.00218182		0.408252	0.0364878	0.00132802	0.000846919	0.00322004	0.00150981
		Methylophilales	Methylophilaceae	Methylophilaceae_unclassified		0.000438789															0.0106242
	Deltaproteobacteria	Desulfovibrionales	Desulfovibrionaceae	Desulfovibrio								0.000111074		0.0109123
	Gammaproteobacteria	Acidithiobacillales	Acidithiobacillaceae	Acidithiobacillus	0.344828	0.27161	0.0495646		0.0673443	0.0257778		0.025547	0.0388388	0.023134	0.0187539	0.0507246	0.0378182		0.0477742	0.0628124	0.0606463	0.0226551	0.0314848	0.0402617
		Alteromonadales	Alteromonadaceae	Marinobacter	0.0568663	0.0636244	0.0522438		0.105464	0.0462222		0.0245474	0.0345233	0.0541248	0.0309981	0.103261	0.0858182		0.0521173	0.0461513	0.1027	0.0406521	0.0490161	0.0629089
		Gammaproteobacteria_unclassified	Gammaproteobacteria_unclassified	Gammaproteobacteria_unclassified	0.00544465	0.0109697	0.00267917		0.0127065	0.00711111		0.00399867	0.00411926	0.00436491	0.00232486	0.00543478	0.00290909		0.0119435	0.00949683	0.0084108	0.00465806	0.00286225	0.0035229
		Legionellales	Legionellaceae	Legionella	0.130672	0.104871	0.000334896		0.00127065	0.000444444		0.000444296	0.000784621	0.000436491	0.000309981	0.00543478	0.00145455			0.00133289	0.00132802		0.000715564	0.000503271
				Legionellaceae_unclassified	0.0145191	0.0802984	0.00133958			0.00222222		0.000333222			0.000619963	0.00181159	0.000727273				0.00265604	0.00042346		0.00100654
		Pasteurellales	Pasteurellaceae	Haemophilus													0.0109091
		Pseudomonadales	Moraxellaceae	Acinetobacter	0.000604961	0.00131637	0.00133958			0.00533333		0.000222148		0.00130947	0.000464972	0.0235507	0.00581818			0.000499833	0.0699425	0.00021173	0.000357782	0.00402617
				Enhydrobacter	0.000604961	0.00175516	0.000669792		0.00381194	0.102667		0.000999667	0.00117693	0.00872981	0.000309981		0.00145455			0.000333222	0.00177069	0.000635189	0.00107335	0.0613991
			Pseudomonadaceae	Pseudomonas	0.000604961	0.00263273	0.025787		0.00762389	0.117333		0.00055537	0.000784621	0.0327368	0.00123993		0.0829091		0.00162866	0.000999667	0.119965	0.00105865	0.0103757	0.134877
		Xanthomonadales	Xanthomonadaceae	Metallibacterium	0.00907441	0.00526547	0.00368386		0.0114358	0.004		0.0094413	0.0178501	0.00436491	0.00263484	0.00724638	0.00363636		0.0162866	0.287737	0.00398406	0.0021173	0.0039356	0.0070458
				Thermomonas			0.000334896			0.0422222		0.000111074					0.000727273			0.000166611	0.000442674		0.000357782	0.000503271
			Xanthomonadales_Incertae_Sedis	Acidibacter	0.00907441	0.0109697	0.0421969		0.0101652	0.00222222		0.00655337	0.00706159	0.0432126	0.00542467	0.00181159	0.0305455		0.0282302	0.0448184	0.0159363	0.00381114	0.00143113	0.0035229
			Xanthomonadales_unclassified	Xanthomonadales_unclassified		0.000438789	0.0107167						0.000588466				0.00145455		0.00108578	0.00316561	0.0323152		0.000357782	0.00150981
	Proteobacteria_unclassified	Proteobacteria_unclassified	Proteobacteria_unclassified	Proteobacteria_unclassified	0.00362976	0.000877578	0.00133958		0.00889454	0.00266667		0.00111074	0.00196155	0.00305543	0.00108493	0.00362319	0.00145455		0.00542888	0.011996	0.00442674	0.00127038	0.00322004	0.00201309
TM6_(Dependentiae)	TM6_(Dependentiae)_cl	TM6_(Dependentiae)_or	TM6_(Dependentiae)_fa	TM6_(Dependentiae)_ge	0.0320629	0.00570426	0.000669792			0.000444444		0.000222148		0.000436491		0.00362319	0.000727273		0.000542888	0.000333222		0.00021173
Other bacteria <0.1%					0.0629159	0.0364195	0.0502344		0.0825921	0.0466667		0.0233256	0.0331503	0.046268	0.0142591	0.0688406	0.0603636		0.0407166	0.044985	0.059761	0.0213847	0.0332737	0.0709612

## Sheet: Table S3
Table S3. Relative abundance of fungal genera present in the different samples and enrichment cultures. All genera present at higher than 0.1% relative abundance in at least one sample or enrichment are shown. The genera present at less than 0.1% relative abundance in all samples or enrichments are included in the ‘Other fungi’ group at the end of the table.
Phylum	Class	Order	Family	Genus	P240m_A	P240m_B	P240m_180	P240m_176	P240m_Fe(III)	P240m_Fe(III)Ye		P500m_A	P500m_B	P500m_180	P500m_176	P500m_(FeIII)	P500m_(FeIII)Ye		P600m_A	P600m_B	P600m_180	P600m_176	P600m_Fe(III)	P600m_Fe(III)Ye
Fungi_unclassified						0.806429	0.398004		0.193616	0.306177		0.384968	0.417585	0.246898	0.246966	0.140064	0.274608			0.671527	0.258865	0.174342	0.126378	0.11281
Ascomycota	Dothideomycetes	Capnodiales	Davidiellaceae	Cladosporium		0.000229621	0.0011451		0.00260236	0.00106496		0.00080819	0.00143747	0.00180972	0.00131191	0.000454752	0.000200884			0.000265111	0.00163666	0.0240132	0.000565451	0.000305717
				Davidiella		0.00780712	0.0220841		0.073907	0.0436635		0.0261315	0.0203642	0.460186	0.0429649	0.0309231	0.0988349			0.0184252	0.24168	0.221382	0.115352	0.0155916
			Teratosphaeriaceae	Acidomyces		0.00137773	0.00539833		0.00589868	0.00212993		0.00915948	0.00431241	0.00336091	0.08265	0.000909504	0.00200884			0.00212089	0.00136388	0.00526316	0.0011309	0.00305717
			Capnodiales_unclassified	Capnodiales_unclassified		0.00390356	0.00817929		0.0147467	0.00319489		0.00942888	0.00934356	0.0113754	0.00393572	0.00363802	0.00421856			0.00304878	0.000272777	0.00592105	0.00735086	0.00794864
		Dothideales	Dothioraceae	Dothioraceae_unclassified		0.000918485	0.000490757		0.00902151	0.014377		0.00107759	0.00407283	0.00232678	0.00131191	0.00227376	0.162314			0.00410923	0.000818331	0.00328947	0.00254453	0.000917151
		Pleosporales	Pleosporaceae	Pleosporaceae_unclassified		0.000918485	0.00245379		0.00225538	0.00159744		0.00269397	0.00287494	0.00284385	0.00327976	0.00318327	0.0678988			0.00132556	0.00109111	0.000328947	0.00254453	0.00458575
				Epicoccum		0.00114811	0.00294454		0.00641915	0.00319489		0.00592672	0.0033541	0.0049121	0.00623155	0.0104593	0.00522298			0.002386	0.0035461	0.00625	0.00508906	0.00458575
			Pleosporales_family_Incertae_sedis	Pleosporales_family_Incertae_sedis_unclassified		0.00137773	0.00425323		0.0135323	0.0106496		0.0242457	0.0222808	0.00749741	0.0104952	0.0109141	0.00241061			0.00516967	0.00627387	0.0174342	0.10376	0.00825436
				Ascochyta		0.000229621	0.000981515		0.00312283	0.00212993		0.00134698	0.0033541	0.00129266	0.00327976	0.00181901	0.000401768			0.000397667	0.000272777	0.00789474	0.0155499	0.000917151
	Eurotiomycetes	Chaetothyriales	Herpotrichiellaceae	Exophiala		0.00367394	0.00752495		0.0117974	0.00798722		0.0118534	0.00910398	0.0118925	0.013447	0.0186448	0.00441945			0.00768823	0.0100927	0.00789474	0.00537178	0.00794864
		Eurotiales	Trichocomaceae	Aspergillus		0.00849598	0.0191395		0.0261971	0.0106496		0.0145474	0.0162913	0.0201655	0.0163988	0.0181901	0.0134592			0.00835101	0.00791053	0.0358553	0.0373198	0.414246
				Penicillium		0.000918485	0.00507116		0.00624566	0.00745474		0.00323276	0.00527072	0.00672182	0.150541	0.00636653	0.00421856			0.00609756	0.00109111	0.00592105	0.00565451	0.00580862
			Eurotiales_unclassified	Eurotiales_unclassified		0.000918485	0.00425323		0.0055517	0.00798722		0.00431034	0.00311452	0.00361944	0.00426369	0.00454752	0.0012053			0.00198834	0.00218221	0.00460526	0.0022618	0.0284317
	Lecanoromycetes	Agyriales	Agyriaceae	Trapeliopsis		0.00114811	0.0022902		0.00225538	0.000532481		0.00161638	0.00143747	0.000775595	0.00295179	0.00227376	0.00160707			0.00092789	0.00109111	0.000657895	0.00339271	0.0440232
	Leotiomycetes	Helotiales	unclassified_Helotiales	unclassified_Helotiales			0.0045804		0.0109299	0.00212993		0.0107759	0.0100623	0.00620476	0.00655953	0.327422	0.00140619			0.00397667	0.00409165	0.00526316	0.00452361	0.0055029
			Helotiales_unclassified	Helotiales_unclassified		0.00114811	0.00163586		0.00607217	0.00159744		0.0344828	0.0333014	0.00232678	0.00131191	0.000909504	0.000803536			0.00291622	0.00272777	0.00197368	0.00197908	0.00152858
	Saccharomycetes	Saccharomycetales	Saccharomycetales_family_Incertae_sedis	Candida		0.00114811	0.00245379		0.00433727	0.00212993		0.00188578	0.00287494	0.00387797	0.000983929	0.0827649	0.00200884			0.000530223	0.000545554	0.00328947	0.00339271	0.00336289
	Sordariomycetes	Sordariomycetes_unclassified	Sordariomycetes_unclassified	Sordariomycetes_unclassified					0.000520472	0.00745474					0.000327976	0.000909504							0.000848176	0.0198716
		Hypocreales	Hypocreales_family_Incertae_sedis	Acremonium		0.00298507	0.00588909		0.0159611	0.0111821		0.00835129	0.00742693	0.0098242	0.0055756	0.00864029	0.0680996			0.00543478	0.00136388	0.00921053	0.00367543	0.00764292
				Sarocladium		0.00137773	0.00147227		0.00399028	0.00159744		0.00215517	0.0033541	0.00232678	0.00196786	0.00409277	0.000803536			0.00106045	0.00545554	0.0398026	0.00339271	0.000611434
			Nectriaceae	Fusarium		0.000688863	0.110257		0.00468425	0.00266241		0.00646552	0.00383325	0.00517063	0.00426369	0.00136426	0.00220972			0.00132556	0.00109111	0.00625	0.00310998	0.00336289
			Hypocreales_unclassified	Hypocreales_unclassified		0.000688863	0.000654343		0.00156142	0.0665602		0.000269397	0.00167705	0.000517063	0.00163988	0.000909504	0.000602652			0.00132556	0.000545554	0.000986842	0.0011309	0.000917151
		Xylariales	Amphisphaeriaceae	Adisciso		0.0973594	0.00130869		0.00312283	0.00319489		0.000269397	0.00143747		0.00229583	0.00227376	0.000200884			0.00304878	0.00327332	0.00263158	0.000282725	0.000305717
	Ascomycota_unclassified	Ascomycota_unclassified	Ascomycota_unclassified	Ascomycota_unclassified		0.00895522	0.0287911		0.0395559	0.169329		0.289062	0.277192	0.0299897	0.0226304	0.0386539	0.034552			0.0241251	0.0160938	0.03125	0.0378852	0.0975237
Basidiomycota	Agaricomycetes	Agaricomycetes_unclassified	Agaricomycetes_unclassified	Agaricomycetes_unclassified		0.000688863	0.0117782		0.000346981	0.00106496			0.000479157	0.000775595	0.000327976		0.000401768			0.00106045	0.000818331	0.000657895	0.00537178	0.000917151
		Auriculariales	Auriculariales_family_Incertae_sedis	Basidiodendron		0.000459242	0.00179944		0.00433727	0.00532481		0.00161638	0.00383325	0.00129266	0.00163988	0.00318327	0.000803536			0.000397667	0.000818331	0.177303		0.000305717
		Cantharellales	unclassified_Cantharellales	unclassified_Cantharellales		0.000459242	0.0224113		0.000173491	0.00106496		0.000269397	0.000718735	0.00387797	0.000327976	0.000454752	0.000401768			0.000530223	0.000545554	0.00263158	0.000565451	0.00122287
		Hymenochaetales	Hymenochaetaceae	Phellinus		0.000229621	0.0577458		0.000520472	0.000532481		0.00296336	0.00215621	0.00232678	0.000655953	0.00181901	0.000803536			0.00397667	0.00136388	0.000657895	0.0011309	0.000305717
		Polyporales	Meruliaceae	Scopuloides		0.000459242	0.000817929		0.00173491	0.00212993		0.00323276	0.00311452	0.00258532	0.00196786	0.00181901	0.0711129			0.00159067	0.00109111	0.00394737	0.000282725	0.0018343
	Basidiomycota_class_Incertae_sedis	Malasseziales	Malasseziales_family_Incertae_sedis	Malassezia		0.0121699	0.029609		0.412561	0.0500532		0.0274784	0.0237183	0.0449845	0.220728	0.150068	0.0186822			0.0235949	0.0381888	0.0394737	0.0619169	0.0256802
			unclassified_Malasseziales	unclassified_Malasseziales		0.00160735	0.00278096		0.00815406	0.00479233		0.00727371	0.00598946	0.00827301	0.00491965	0.00500227	0.00321414			0.00702545	0.150846	0.0917763	0.00621996	0.00428004
	Microbotryomycetes	Sporidiobolales	Sporidiobolales_family_Incertae_sedis	Sporobolomyces		0.00183697	0.00278096		0.00641915	0.0159744		0.00377155	0.0033541	0.00542916	0.00852739	0.00363802	0.00160707			0.002386	0.00136388	0.00230263	0.0344925	0.00152858
	Tremellomycetes	Tremellales	Tremellales_family_Incertae_sedis	Cryptococcus		0.00459242	0.178799		0.0202984	0.0415335		0.0218211	0.0208433	0.0206825	0.0249262	0.0300136	0.0158698			0.00967656	0.170213	0.0111842	0.334182	0.0134515
				Dioszegia		0.000459242	0.0011451		0.000693963	0.00212993		0.000269397	0.000718735	0.00129266			0.0815589			0.000397667	0.000818331	0.00131579	0.000565451	0.000917151
		Trichosporonales	Trichosporonaceae	Trichosporon		0.000459242	0.00719778		0.00624566	0.0149095		0.0080819	0.00742693	0.00361944	0.00852739	0.00409277	0.00401768			0.00344645	0.00272777	0.00263158	0.00876449	0.00519719
	Basidiomycota_unclassified	Basidiomycota_unclassified	Basidiomycota_unclassified	Basidiomycota_unclassified		0.000688863	0.0112874		0.017696	0.00425985		0.00646552	0.00862482	0.00387797	0.0147589	0.00363802	0.0154681			0.00198834	0.0297327	0.00460526	0.0243144	0.00764292
Chytridiomycota	Chytridiomycetes	Chytridiomycetes_unclassified	Chytridiomycetes_unclassified	Chytridiomycetes_unclassified		0.0032147	0.000163586		0.000520472	0.000532481		0.00080819	0.00119789	0.000258532	0.00163988		0.000803536			0.014316		0.00131579	0.000848176	0.000305717
		Rhizophydiales	Rhizophydiales_unclassified	Rhizophydiales_unclassified		0.00206659	0.0011451		0.00277585	0.000532481		0.00188578	0.00287494	0.00155119	0.00229583	0.00409277	0.0012053			0.0478526	0.000818331	0.00131579	0.000282725	0.00580862
	Chytridiomycota_unclassified	Chytridiomycota_unclassified	Chytridiomycota_unclassified	Chytridiomycota_unclassified		0.00114811	0.000163586		0.00312283	0.00106496		0.00242457	0.00239578	0.00284385	0.00295179	0.00181901	0.00100442			0.0747614	0.000818331	0.00197368	0.000848176	0.000305717
Unclassified fungi						0.00160735	0.00196303		0.0036433	0.143237		0.00269397	0.00407283	0.00310238	0.0327976	0.00454752	0.00261149			0.00185578	0.000818331	0.00164474	0.0022618	0.00152858
Other fungi <0.1%						0.0140069	0.0271552		0.0428522	0.0202343		0.0538793	0.0431241	0.0473113	0.0354214	0.0632106	0.0267176			0.0275716	0.025641	0.0335526	0.0234662	0.128707
